# Supplementary material for: Antitumor Activity of cGAMP via Stimulation of cGAS-cGAMP-STING-IRF3 Mediated Innate Immune Response
Source: PubMed Central journal article supplement (PMC4709567; doi:10.1038/srep19049), 2016-01-12
Supplement: srep19049-s1.pdf [file srep19049-s1.pdf]

## Supplementary Information for

# Antitumor Activity of cGAMP *via* Stimulation of cGAS-cGAMP-STING-IRF3 Mediated Innate Immune Response

Tiejun Li<sup>2,+</sup>, Hao Cheng<sup>1,+</sup>, Hong Yuan<sup>1,+</sup>, Qiming Xu<sup>1</sup>, Chang Su<sup>3</sup>,  
Yuefan Zhang<sup>2</sup>, Pengbiao Xu<sup>1</sup>, Jason Tan<sup>3</sup>, Yaocheng Rui<sup>2</sup>, Pingwei Li<sup>3</sup>, and  
Xiangshi Tan<sup>1\*</sup>

<sup>1</sup>Department of Chemistry & Shanghai Key Laboratory of Chemical Biology for Protein Research and Institutes of Biomedical Sciences, Fudan University, Shanghai, 200433, China

<sup>2</sup>Department of Pharmacology, School of Pharmacy, Second Military Medical University, Shanghai, 200433, China

<sup>3</sup>Department of Biochemistry and Biophysics, Texas A&M University, College Station, TX 77843, USA

**Figure S1. cGAMP could not stimulate the expression of IRF3, IFN- $\beta$  and IFN- $\gamma$  in STING defective mice**

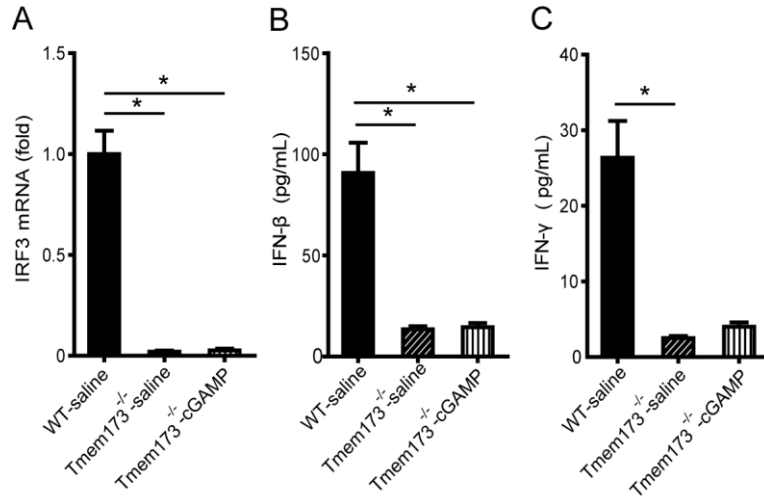

STING<sup>-/-</sup> mice were treated with cGAMP (20 mg/kg) once a day. (A) The relative expression of IRF3 was detected by Real-time PCR in tumor tissues. (B) The concentration of IFN- $\beta$  and IFN- $\gamma$  in serum was measured by ELISA. Representative data are shown from two experiments conducted with 10 mice per group. Data are represented as mean  $\pm$  SEM.

**Figure S2. cGAMP has no direct impact on CT26 cells and T cells in vitro**

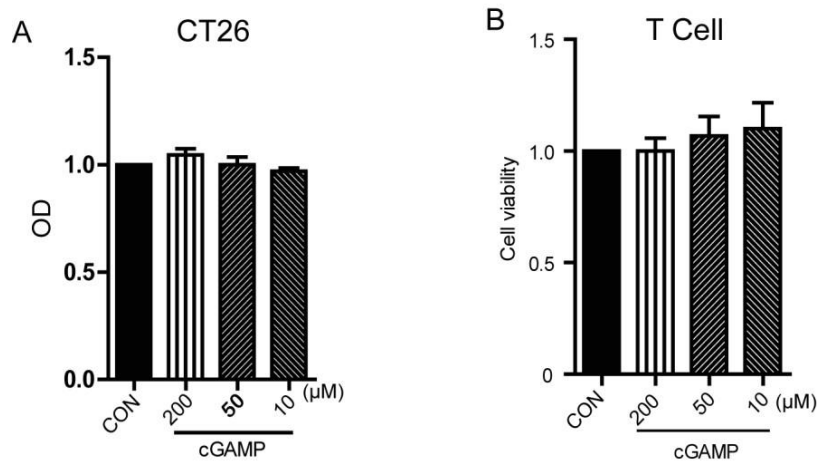

CT26 cells were plated in 96-well culture plates at  $5 \times 10^4$  cells/well, and incubated with cGAMP for 48h. CT26 cell viability were analyzed by MTT assay. T cells were purified with microbeads from spleen according to the manufacturer's instructions. Cells were plated in 96-well culture plates and incubated with cGAMP for 48h. Viability of T cells were analyzed by CCK8 assay. cGAMP has no cytotoxicity on (A) CT26 cells, (B) T cells.

**Figure S3. cGAMP has no impact on immune cells**

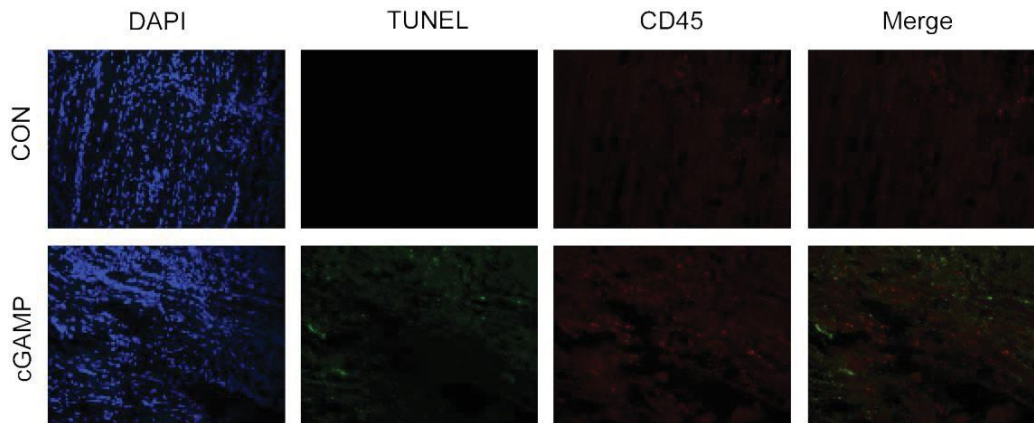

Colon 26 tumor-bearing mice were treated with cGAMP from day 0 to day 20 with 20 mg/kg daily.

TUNEL and CD45 were detected with tumor tissues by immunofluorescence technique (200 $\times$ ).

**Figure S4. cGAMP can't active DCs in STING defective mice**

**A**

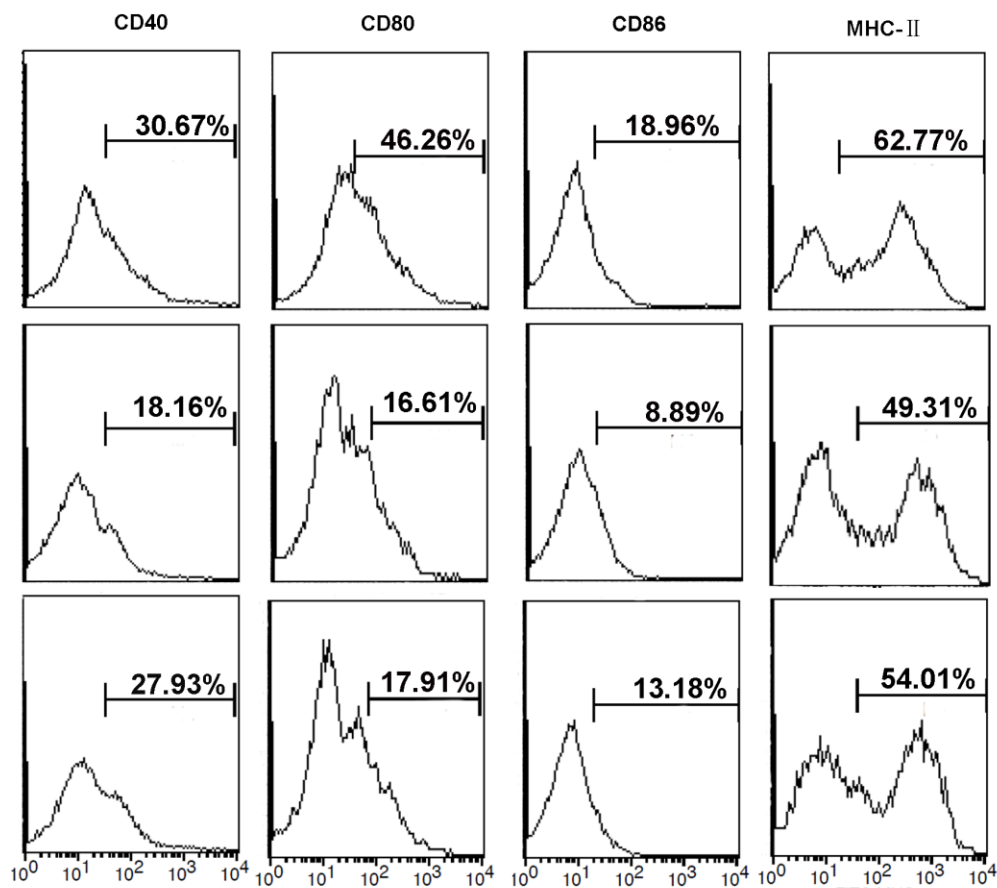

**B**

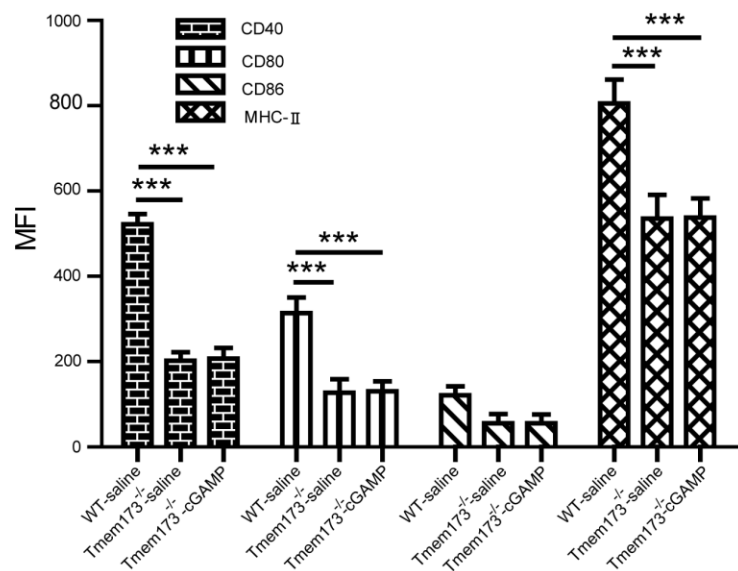

Tumor bearing wild-type and STING<sup>-/-</sup> mice were treated with or without cGAMP from day 0 to day 20 with 20 mg/kg daily. Flow cytometry was applied to detect DCs from spleen with (A) key surface markers: CD40<sup>+</sup>, CD80<sup>+</sup>, CD86<sup>+</sup> and MHC-II on 20<sup>th</sup> day, respectively, and calculated with (B) Mean Fluorescence Intensity (MFI). Representative data are shown from two experiments conducted with 10 mice per group. Data are represented as mean ± SEM.

**Figure S5. cGAMP induces increase of CD8<sup>+</sup> T cells**

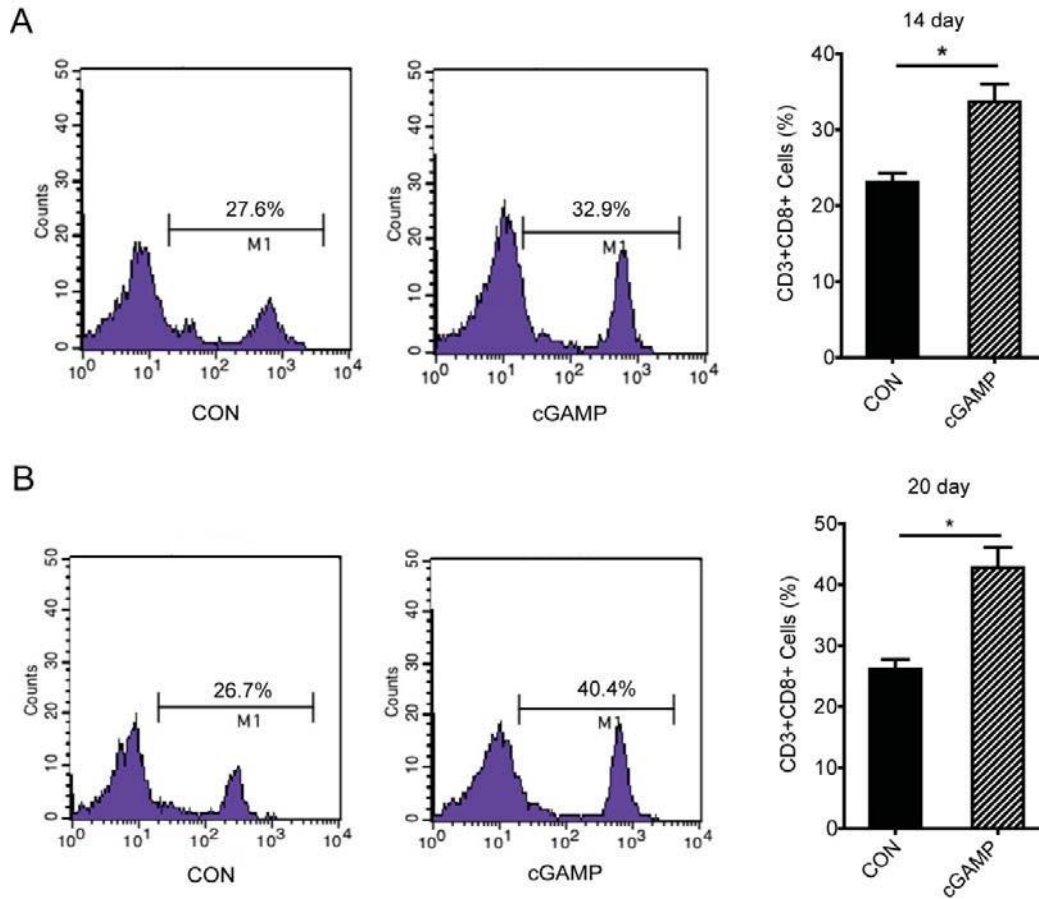

Colon 26 tumor-bearing mice were treated with cGAMP from day 0 to day 20 with 20 mg/kg daily.

Flow cytometry was applied to detect CD3<sup>+</sup>CD8<sup>+</sup> T cells from spleen with key surface markers:

CD8<sup>+</sup> on 14<sup>th</sup> day (A) and 20<sup>th</sup> day (B) respectively, and calculated with percentage of CD8 positive

cells in CD3<sup>+</sup> T cells (A and B). Representative data are shown from two experiments conducted

with 10 mice per group. Data are represented as mean  $\pm$  SEM, \*p < 0.05 (Student's t test in A and

B).

**Figure S6. cGAMP has no toxicity on liver and kidney tissues**

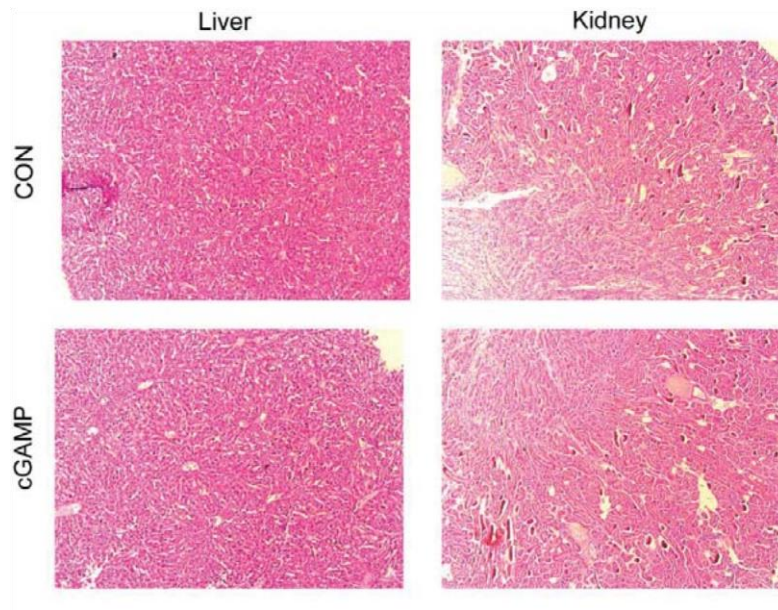

Colon 26 tumor-bearing mice were treated with cGAMP (20 mg/kg) daily for 20d. The liver and kidney tissues were embedded and HE staining was carried out for pathological detection (200×).



**Figure S7. cGAMP regulates expression of cytokines in tumor bearing mice**

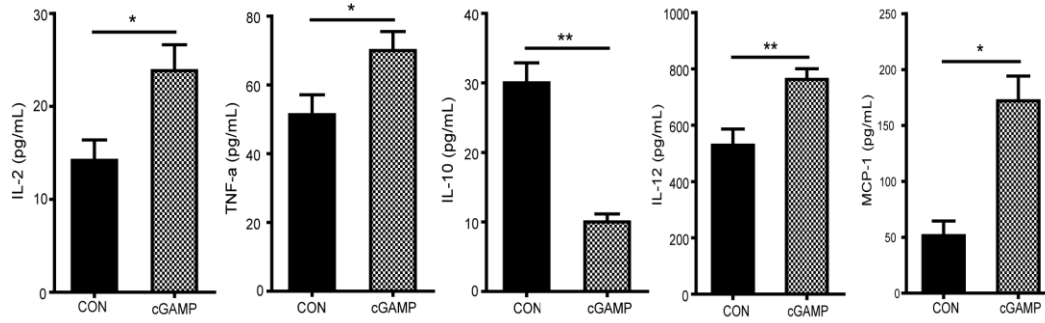

Tumor-bearing mice were treated with cGAMP (20 mg/kg) daily. Concentration of cytokines in serum was measured by ELISA. Representative data are shown from two experiments conducted with 10 mice per group. Data are represented as mean  $\pm$  SEM.

**Figure S8. cGAMP possesses anti-tumor activity in established colon 26 adenocarcinoma tumor model**

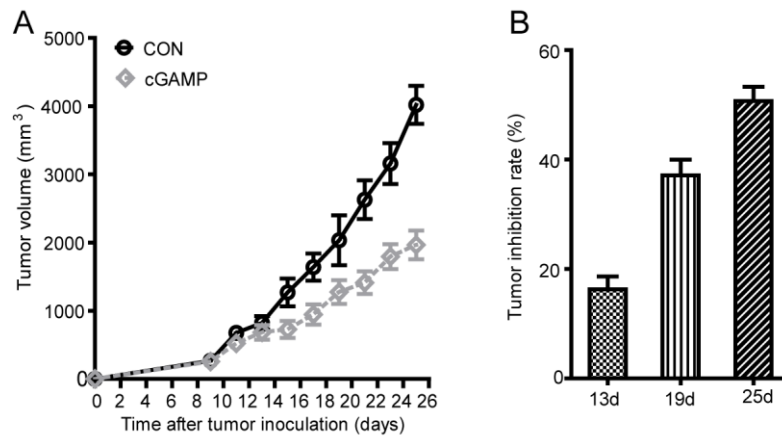

cGAMP was intravenously injected daily after tumors were established (9 days after tumor cells implantation). Colon 26 tumor-bearing mice were treated with cGAMP from day 9 to day 26 with 20 mg/kg. (A) Mean tumor volumes. (B) Tumor inhibition rates of mice in different days.
